# Supplementary material for: Pa negre, el merescut retorn d'Agustí Villaronga
Source: Springer Nature journal article supplement (doi:10.1186/s12951-016-0181-1), 2011-01-01
Supplement: MOESM2 [file 12951_2016_181_MOESM2_ESM.pdf]

Table S1. Tested Spy-Vaccine Antigens

| <b>Spy-antigen</b>                           | <b>Size (kDa)</b> | <b>Expression system</b>   | <b>Organism</b>        | <b>Genebank Accession number</b> |
|----------------------------------------------|-------------------|----------------------------|------------------------|----------------------------------|
| HIS-CTLA-4-SpyTag                            | 15                | Baculovirus                | <i>Mus musculus</i>    | NP_033973.2                      |
| HIS-PD-L1-SpyTag                             | 27                | Baculovirus                | <i>Mus musculus</i>    | NP_068693.1                      |
| SpyCatcher-Survivin-HIS                      | 30                | Baculovirus                | <i>Mus musculus</i>    | NP_033819.1                      |
| HIS-SpyCatcher-IL-5                          | 33                | Baculovirus                | <i>Mus musculus</i>    | NP_034688.1                      |
| SpyCatcher-HER2-HIS                          | 83                | Baculovirus                | <i>Homo Sapiens</i>    | AAA75493.1                       |
| PCSK9-SpyCatcher-HIS                         | 84                | Baculovirus                | <i>Homo Sapiens</i>    | NP_777596.2                      |
| SpyCatcher-CIDR-HIS                          | 32                | Baculovirus                | <i>P. falciparum</i>   | XP_001349512.1                   |
| HIS-CSP-SpyCatcher                           | 53                | Baculovirus                | <i>P. falciparum</i>   | XP_001351122.1                   |
| SpyTag-VAR2CSA (domain region DBL1-ID2a)-HIS | 118               | E. coli SHuffle® C3029H    | <i>P. falciparum</i>   | ADG23053.1                       |
| HIS-Pfs25- SpyCatcher                        | 40                | E. coli SHuffle® C3029H    | <i>P. falciparum</i>   | XP_001347587.1                   |
| SpyCatcher-Ag85A-HIS                         | 48                | One Shot® BL21 Star™ (DE3) | <i>M. tuberculosis</i> | AAK48277.1                       |
