# Supplementary material for: Pa negre, el merescut retorn d'Agustí Villaronga
Source: Springer Nature journal article supplement (doi:10.1186/s12951-016-0181-1), 2011-01-01

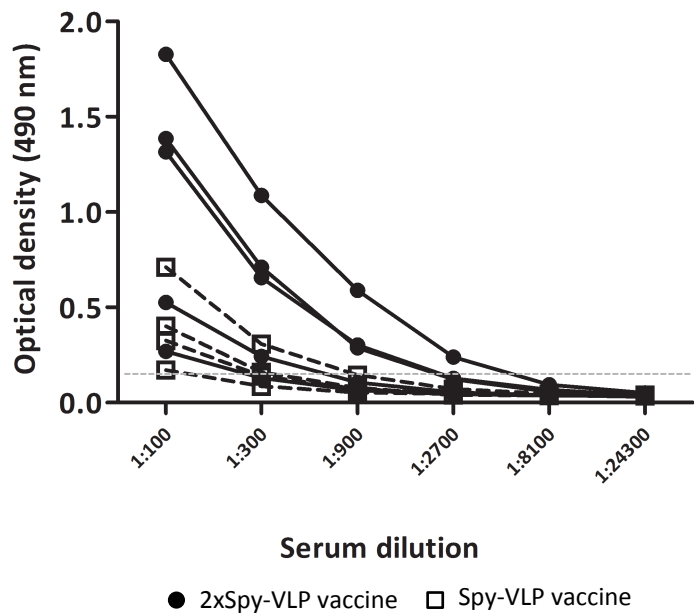

Supplement: MOESM5 [file 12951_2016_181_MOESM5_ESM.pdf]
